# Supplementary material for: Effect of the conformer distribution on the properties of amorphous organic semiconductor films for organic light-emitting diodes
Source: Royal Society of Chemistry journal article supplement (doi:10.1039/d1cp00892g), 2021-01-01
Supplement: d1cp00892g1.pdf [file d1cp00892g1.pdf]

## *Supplementary Information*

# **Effect of the conformer distribution on the properties of amorphous organic semiconductor films for organic light-emitting diodes**

Yoshihito Sukegawa,<sup>a</sup> Kaito Sato,<sup>b</sup> Wataru Fujiwara,<sup>c</sup> Hiroshi Katagiri,<sup>c</sup> Daisuke Yokoyama<sup>\*a,b,d</sup>

<sup>a</sup> Department of Organic Device Engineering, Yamagata University, 4-3-16 Jonan, Yonezawa, Yamagata 992-8510, Japan

<sup>b</sup> Department of Polymer Science and Engineering, Yamagata University, 4-3-16 Jonan, Yonezawa, Yamagata 992-8510, Japan

<sup>c</sup> Graduate School of Science and Engineering, Yamagata University, 4-3-16 Jonan, Yonezawa, Yamagata 992-8510, Japan

<sup>d</sup> Research Center for Organic Electronics (ROEL), Yamagata University, 4-3-16 Jonan, Yonezawa, Yamagata 992-8510, Japan

E-mail: d\_yokoyama@yz.yamagata-u.ac.jp

Fax: +81-238-26-3890; Tel.: +81-238-26-3890

### **Contents**

- A. AFM images of the films (Fig. S1)**
- B. XRD patterns of the films (Fig. S2)**
- C. Reorganization energies for hole transport (Table S1)**
- D. Molecular orientation (Figs. S3 and S4)**
- E. XRR analysis (Fig. S5)**
- F. Conformer distributions (Fig. S6)**
- G. Distortion angles of the triarylamines  $\theta$  (Fig. S7)**
- H. IR absorption spectra (Fig. S8)**
- I. XRD patterns of the powders (Fig. S9)**
- J. Single-crystal X-ray structure determination (Table S2, Fig. S10)**
- K. XRD patterns of the transition-experienced films (Fig. S11)**

## A. AFM images of the films

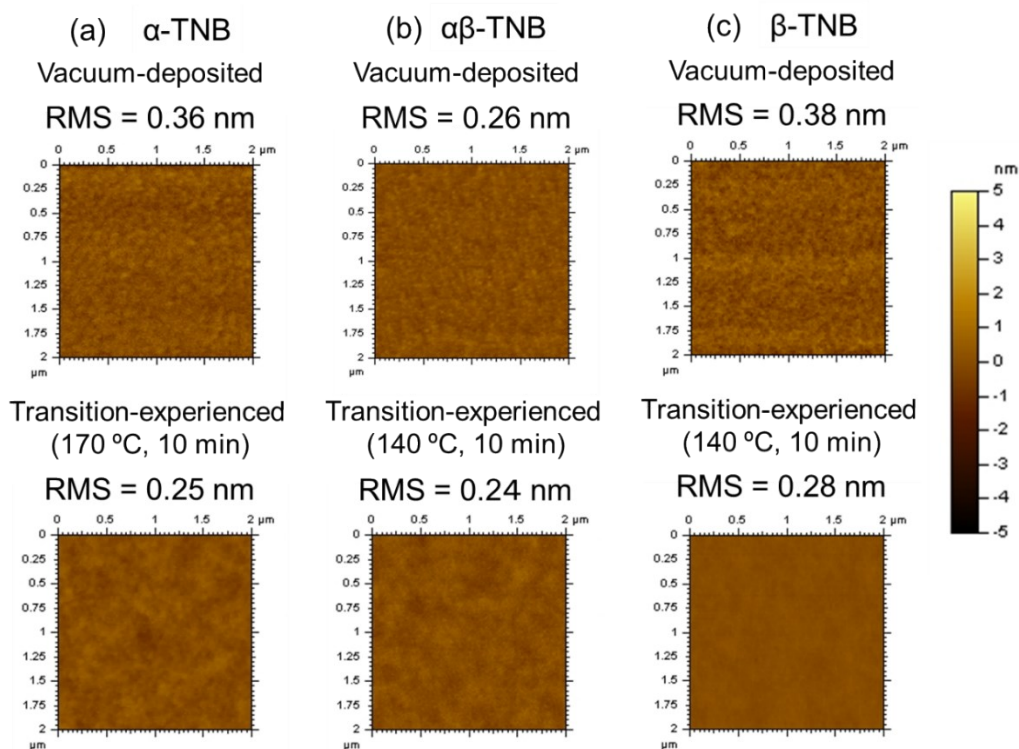

**Fig. S1** AFM images of the surfaces of the vacuum-deposited and transition-experienced films of (a)  $\alpha$ -TNB, (b)  $\alpha\beta$ -TNB, and (c)  $\beta$ -TNB. The thicknesses of the films were  $\sim 100$  nm.

## B. XRD patterns of the films

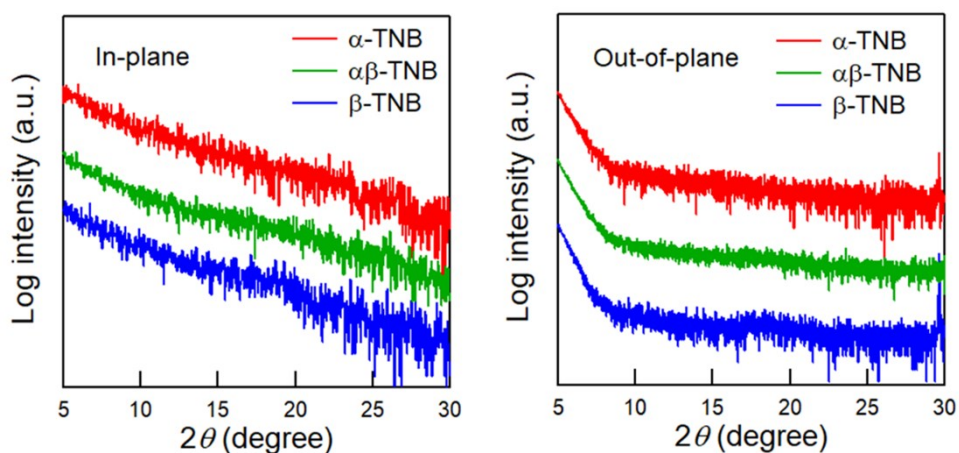

**Fig. S2** In-plane and out-of-plane XRD patterns of vacuum-deposited  $\alpha$ -,  $\alpha\beta$ -, and  $\beta$ -TNB films on a Si substrate. The thicknesses of the films were  $\sim 100$  nm.

### C. Reorganization energies for hole transport

**Table S1** Reorganization energies in hole transfer between two molecules of  $\alpha$ -,  $\alpha\beta$ -, and  $\beta$ -TNB obtained by DFT B3LYP/6-31G(d). The  $\alpha$ -,  $\alpha\beta$ -, and  $\beta$ -TNB molecules have 24, 72, and 24 conformers, respectively (see Section 2.4 in the main text for details), and the reorganization energies highly depend on the conformers. To compare the three isomers, the simple average and the average weighted with the conformer distribution are also given at the bottom of the table.

| Conformation number | $\alpha$ -TNB (eV) | $\alpha\beta$ -TNB (eV) | $\beta$ -TNB (eV) |
|---------------------|--------------------|-------------------------|-------------------|
| 1                   | 0.295              | 0.264                   | 0.227             |
| 2                   | 0.299              | 0.258                   | 0.210             |
| 3                   | 0.309              | 0.266                   | 0.213             |
| 4                   | 0.304              | 0.264                   | 0.211             |
| 5                   | 0.325              | 0.258                   | 0.192             |
| 6                   | 0.304              | 0.256                   | 0.217             |
| 7                   | 0.289              | 0.229                   | 0.207             |
| 8                   | 0.298              | 0.259                   | 0.208             |
| 9                   | 0.296              | 0.259                   | 0.218             |
| 10                  | 0.304              | 0.266                   | 0.218             |
| 11                  | 0.274              | 0.255                   | 0.188             |
| 12                  | 0.282              | 0.259                   | 0.195             |
| 13                  | 0.286              | 0.264                   | 0.196             |
| 14                  | 0.245              | 0.242                   | 0.170             |
| 15                  | 0.253              | 0.245                   | 0.190             |
| 16                  | 0.240              | 0.260                   | 0.219             |
| 17                  | 0.249              | 0.233                   | 0.214             |
| 18                  | 0.240              | 0.264                   | 0.193             |
| 19                  | 0.240              | 0.233                   | 0.198             |
| 20                  | 0.240              | 0.272                   | 0.215             |
| 21                  | 0.248              | 0.229                   | 0.179             |
| 22                  | 0.208              | 0.250                   | 0.161             |
| 23                  | 0.208              | 0.223                   | 0.191             |
| 24                  | 0.197              | 0.264                   | 0.210             |
| 25                  |                    | 0.264                   |                   |
| 26                  |                    | 0.226                   |                   |
| 27                  |                    | 0.233                   |                   |
| 28                  |                    | 0.245                   |                   |
| 29                  |                    | 0.248                   |                   |
| 30                  |                    | 0.201                   |                   |
| 31                  |                    | 0.274                   |                   |

*(Continued on next page)*

(Continued from the previous page)

| Conformation number                                    | $\alpha$ -TNB<br>(eV) | $\alpha\beta$ -TNB<br>(eV) | $\beta$ -TNB<br>(eV) |
|--------------------------------------------------------|-----------------------|----------------------------|----------------------|
| 32                                                     |                       | 0.202                      |                      |
| 33                                                     |                       | 0.231                      |                      |
| 34                                                     |                       | 0.240                      |                      |
| 35                                                     |                       | 0.287                      |                      |
| 36                                                     |                       | 0.221                      |                      |
| 37                                                     |                       | 0.264                      |                      |
| 38                                                     |                       | 0.245                      |                      |
| 39                                                     |                       | 0.229                      |                      |
| 40                                                     |                       | 0.245                      |                      |
| 41                                                     |                       | 0.237                      |                      |
| 42                                                     |                       | 0.246                      |                      |
| 43                                                     |                       | 0.231                      |                      |
| 44                                                     |                       | 0.251                      |                      |
| 45                                                     |                       | 0.246                      |                      |
| 46                                                     |                       | 0.221                      |                      |
| 47                                                     |                       | 0.250                      |                      |
| 48                                                     |                       | 0.249                      |                      |
| 49                                                     |                       | 0.200                      |                      |
| 50                                                     |                       | 0.235                      |                      |
| 51                                                     |                       | 0.227                      |                      |
| 52                                                     |                       | 0.241                      |                      |
| 53                                                     |                       | 0.250                      |                      |
| 54                                                     |                       | 0.233                      |                      |
| 55                                                     |                       | 0.249                      |                      |
| 56                                                     |                       | 0.202                      |                      |
| 57                                                     |                       | 0.244                      |                      |
| 58                                                     |                       | 0.240                      |                      |
| 59                                                     |                       | 0.244                      |                      |
| 60                                                     |                       | 0.219                      |                      |
| 61                                                     |                       | 0.212                      |                      |
| 62                                                     |                       | 0.221                      |                      |
| 63                                                     |                       | 0.243                      |                      |
| 64                                                     |                       | 0.220                      |                      |
| 65                                                     |                       | 0.207                      |                      |
| 66                                                     |                       | 0.212                      |                      |
| 67                                                     |                       | 0.234                      |                      |
| 68                                                     |                       | 0.124                      |                      |
| 69                                                     |                       | 0.208                      |                      |
| 70                                                     |                       | 0.219                      |                      |
| 71                                                     |                       | 0.184                      |                      |
| 72                                                     |                       | 0.222                      |                      |
| Simple average                                         | 0.268                 | 0.238                      | 0.202                |
| Average weighted<br>with the conformer<br>distribution | 0.301                 | 0.244                      | 0.206                |

## D. Molecular orientation

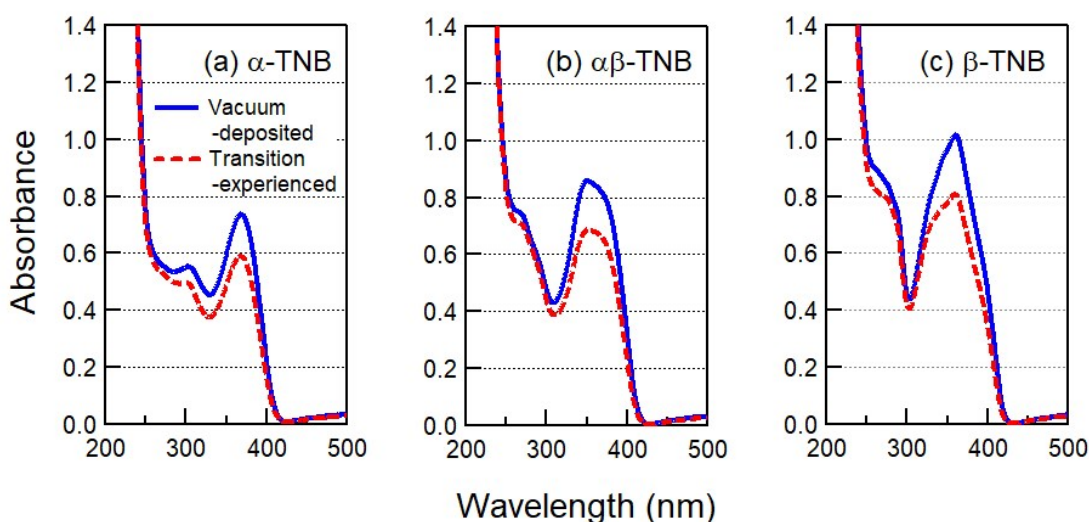

**Fig. S3** Absorption spectra of the vacuum-deposited and transition-experienced films of (a)  $\alpha$ -TNB, (b)  $\alpha\beta$ -TNB, and (c)  $\beta$ -TNB. The solid lines show the spectra of the vacuum-deposited films before annealing, and the dashed lines show those of the transition-experienced films after annealing. From the differences between the absorbance values at the long-wavelength peaks of the vacuum-deposited and transition-experienced films, the orientation order parameters of the long molecular axes ( $S$ ) of  $\alpha$ -,  $\alpha\beta$ -, and  $\beta$ -TNB (see Fig. S6) were estimated to be  $-0.23$ ,  $-0.24$ , and  $-0.23$ , respectively.

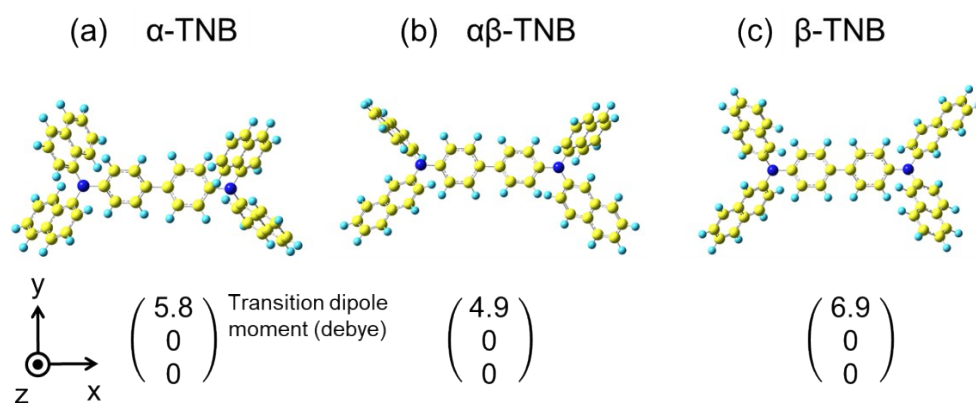

**Fig. S4** Transition dipole moments of the  $\alpha$ -,  $\alpha\beta$ -, and  $\beta$ -TNB molecules with the conformer structures optimized by DFT B3LYP/6-31G(d) calculations. The transition dipole moments along the long molecular axis were obtained by TD-DFT B3LYP/6-311+G(d,p) calculations and correspond to the long-wavelength absorption bands used for estimation of  $S$ .

## E. XRR analysis

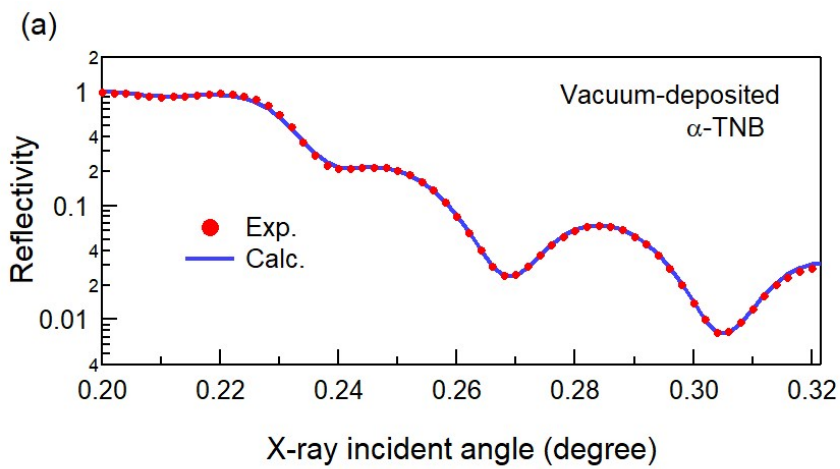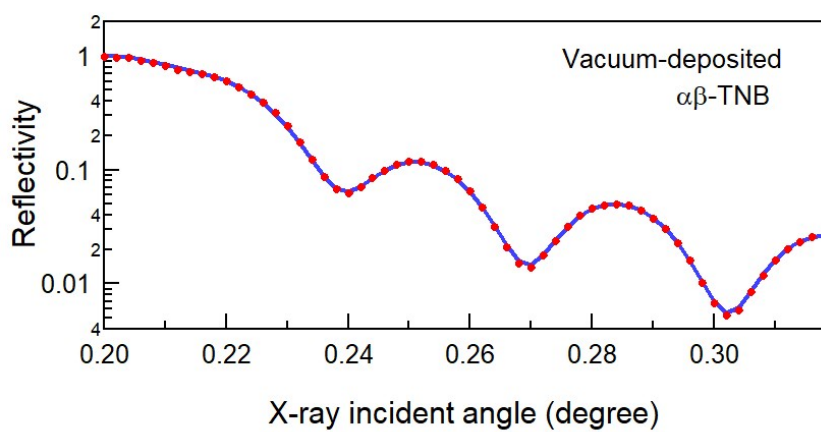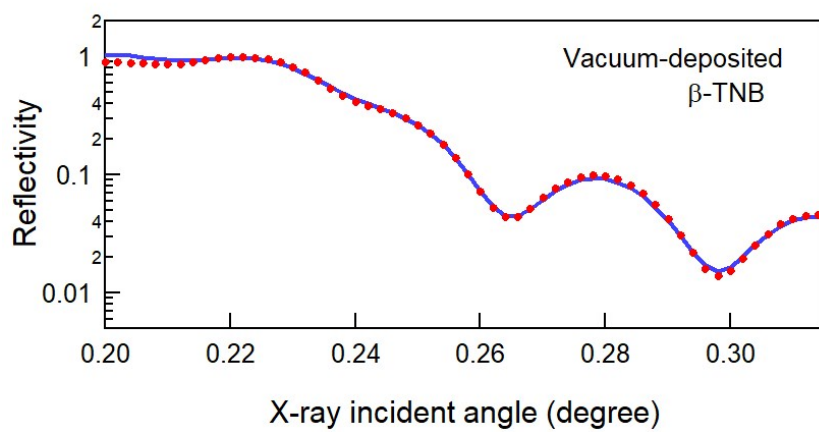

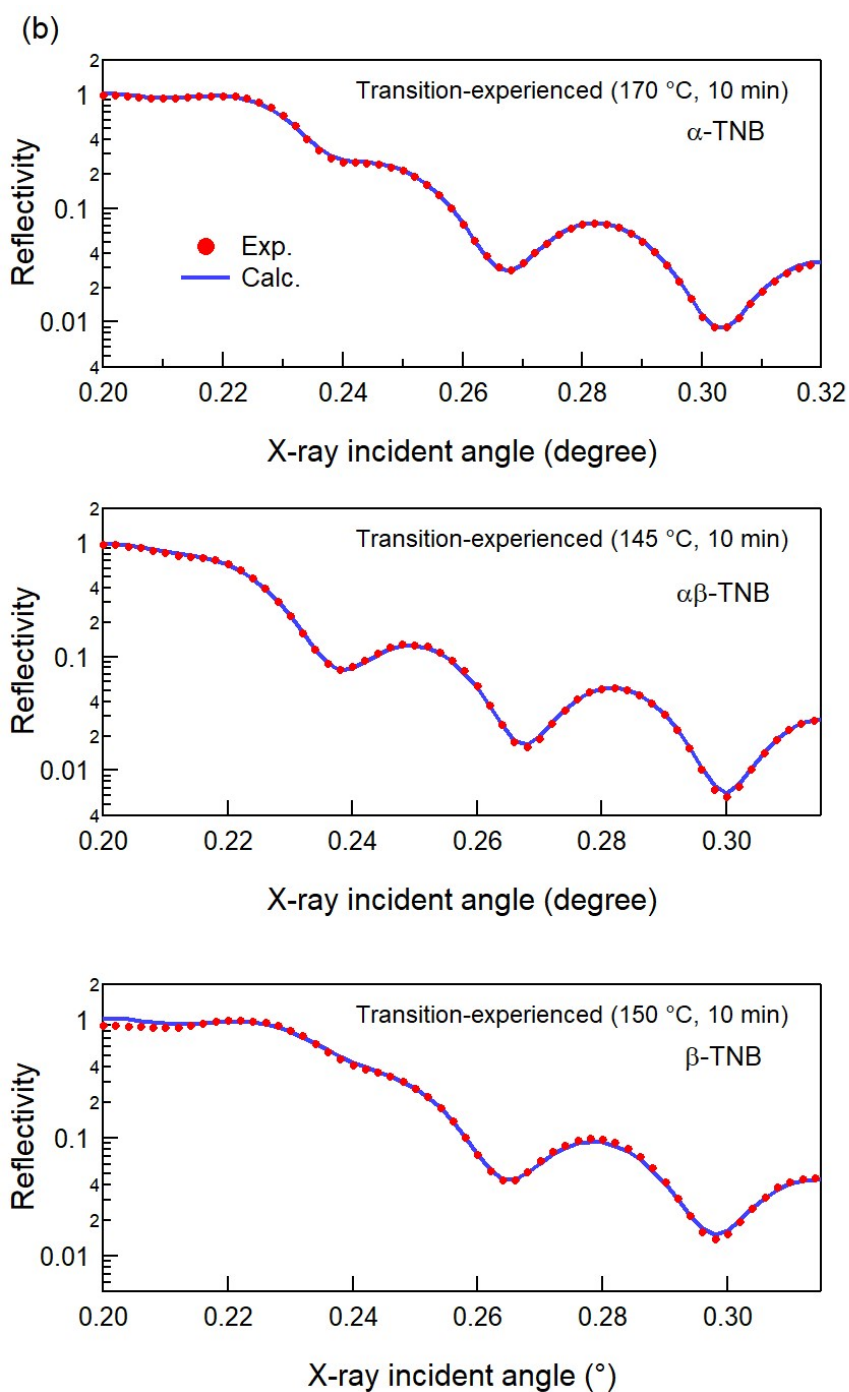

**Fig. S5** XRR patterns of (a) vacuum-deposited and (b) transition-experienced films of  $\alpha$ -,  $\alpha\beta$ -, and  $\beta$ -TNB with a thickness of  $\sim 100$  nm on a Si substrate. From fitting analysis using the theoretical XRR patterns, the film densities of the  $\alpha$ -,  $\alpha\beta$ -, and  $\beta$ -TNB vacuum-deposited films were determined to be 1.16, 1.17, and  $1.17 \pm 0.02$  g cm $^{-1}$ , respectively, and those of the transition-experienced films were determined to be 1.15, 1.16, and  $1.16 \pm 0.02$  g cm $^{-1}$ , respectively.

## F. Conformer distributions

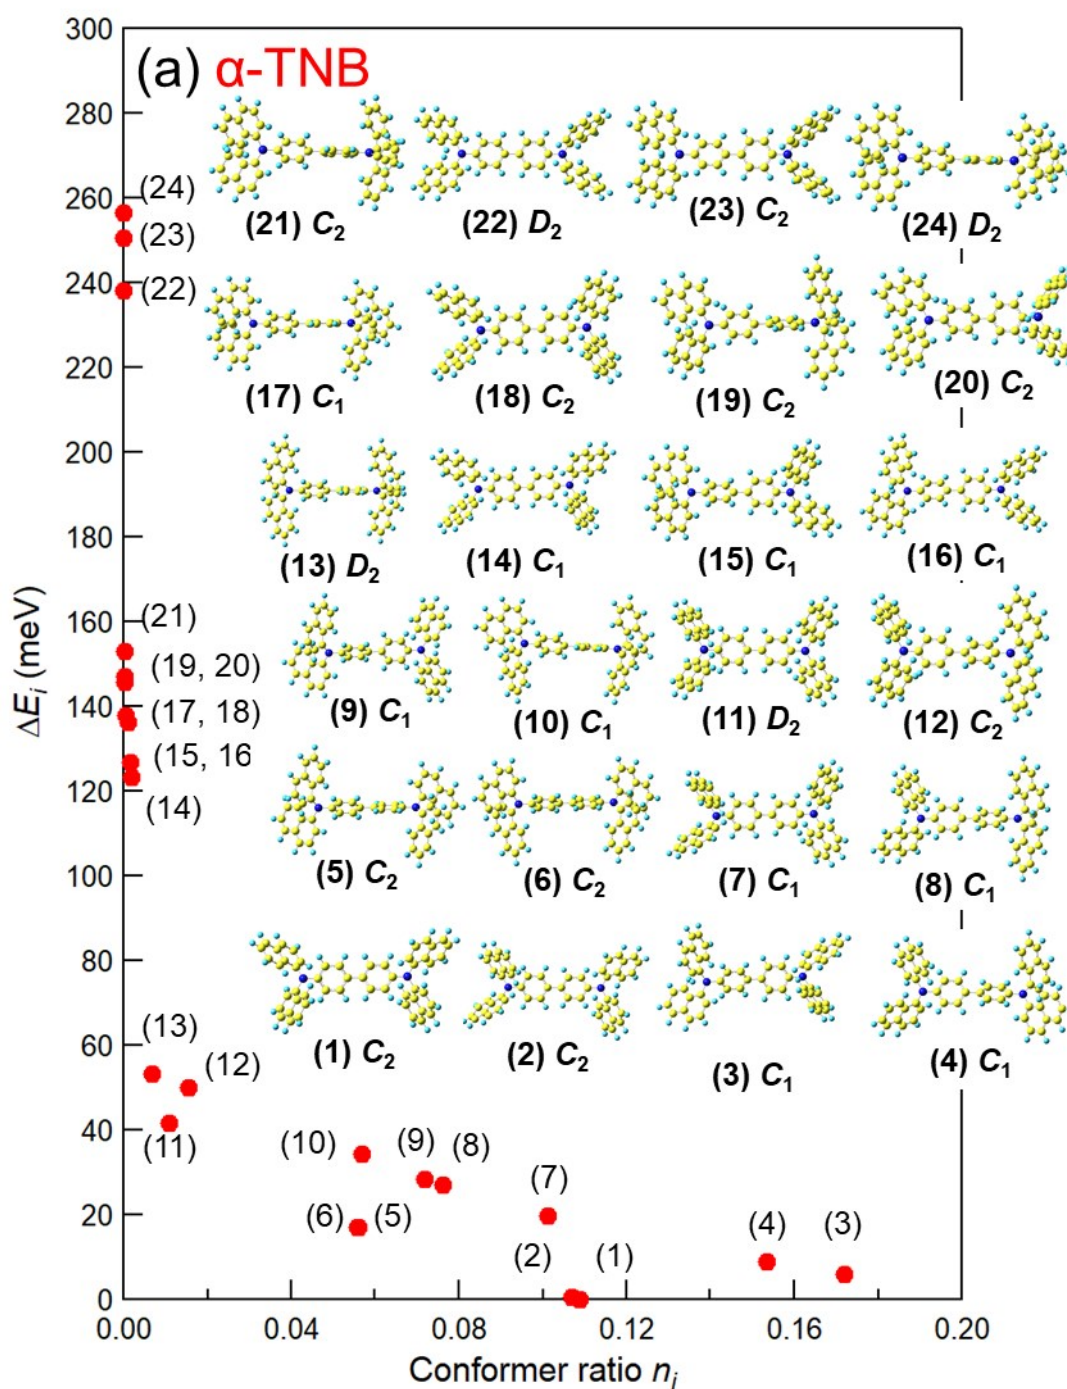



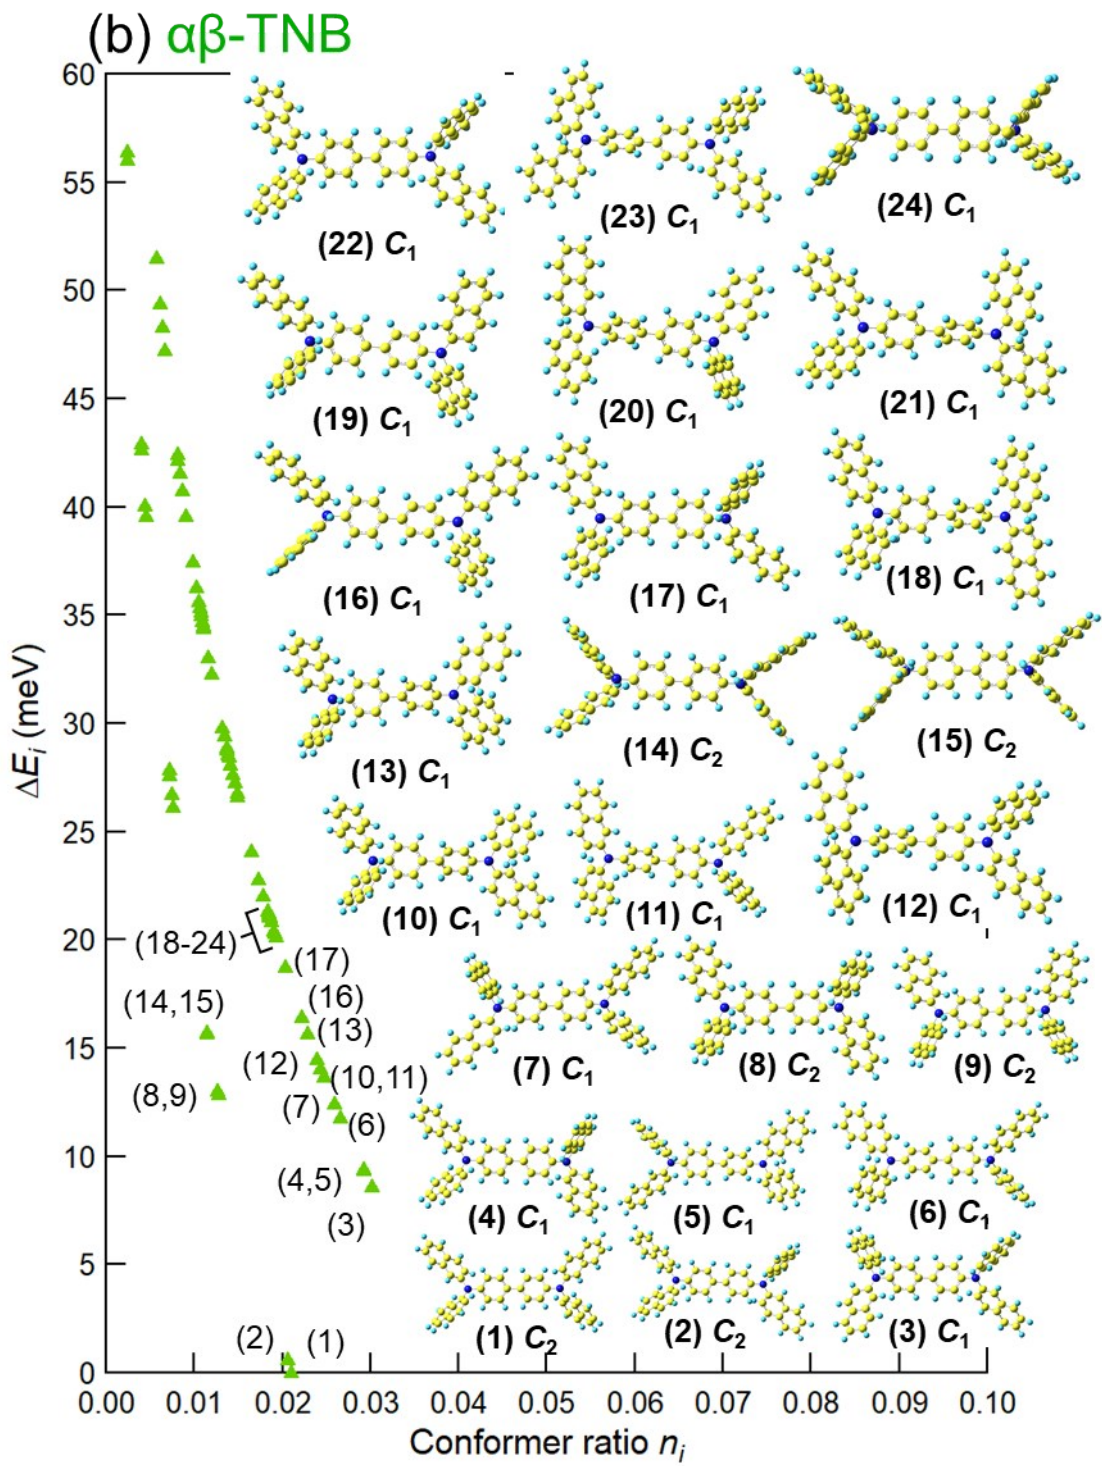

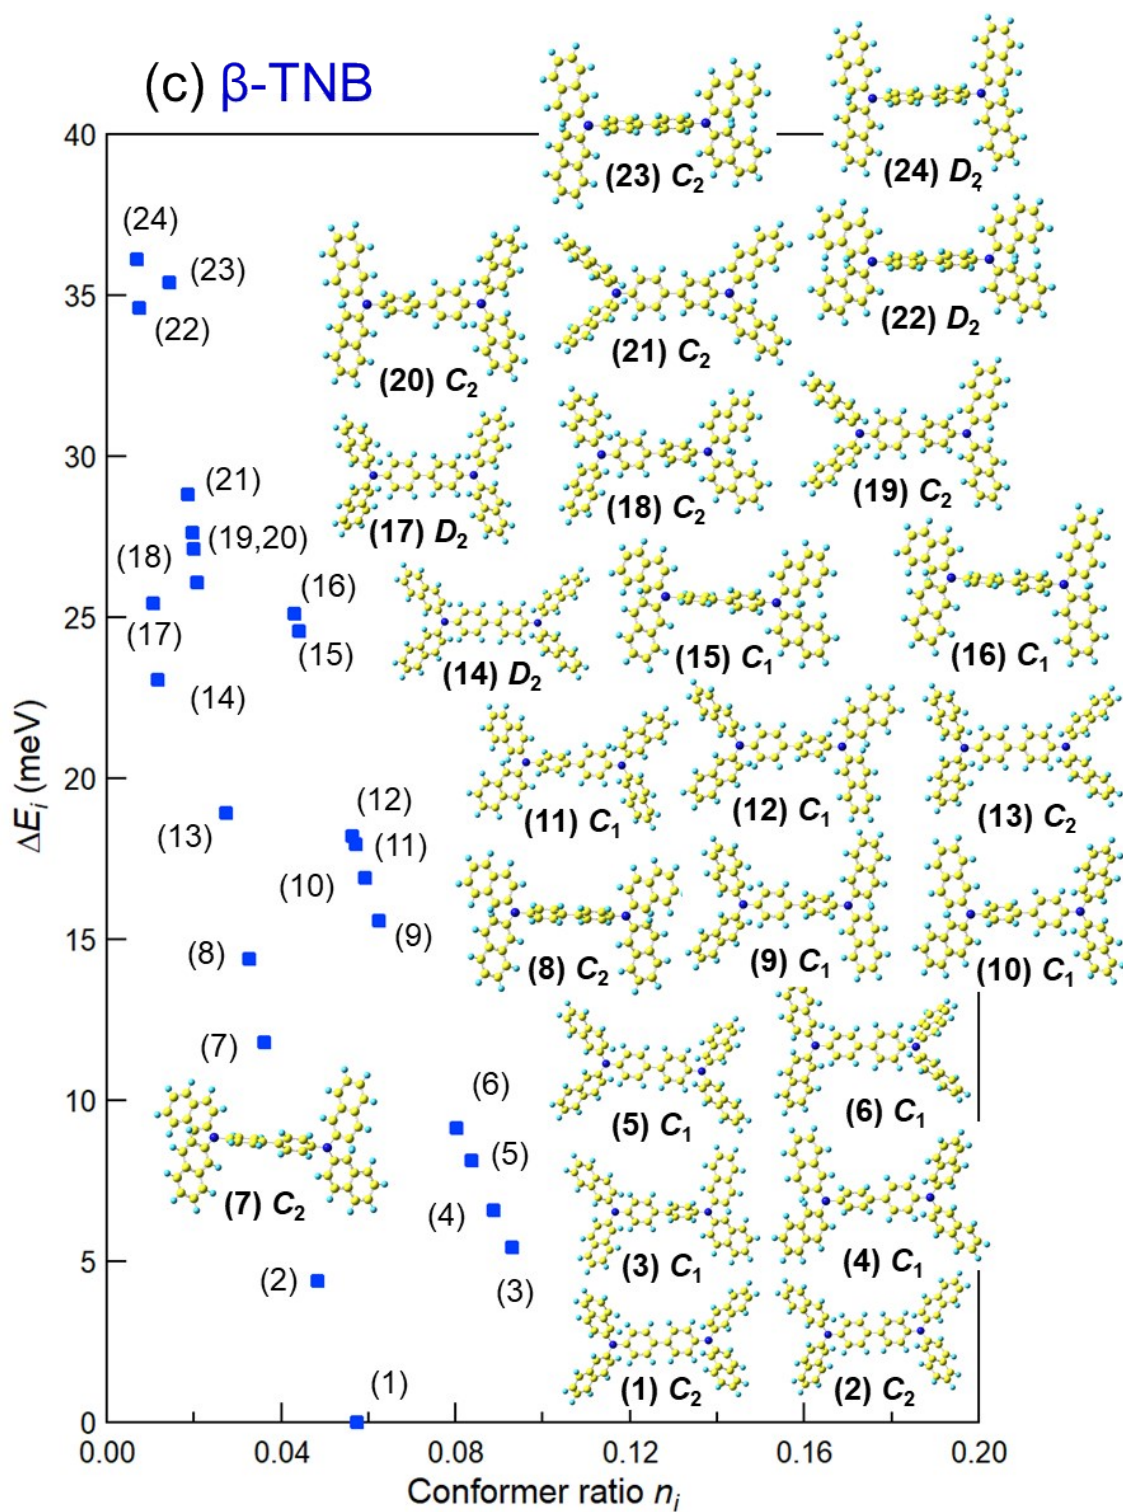

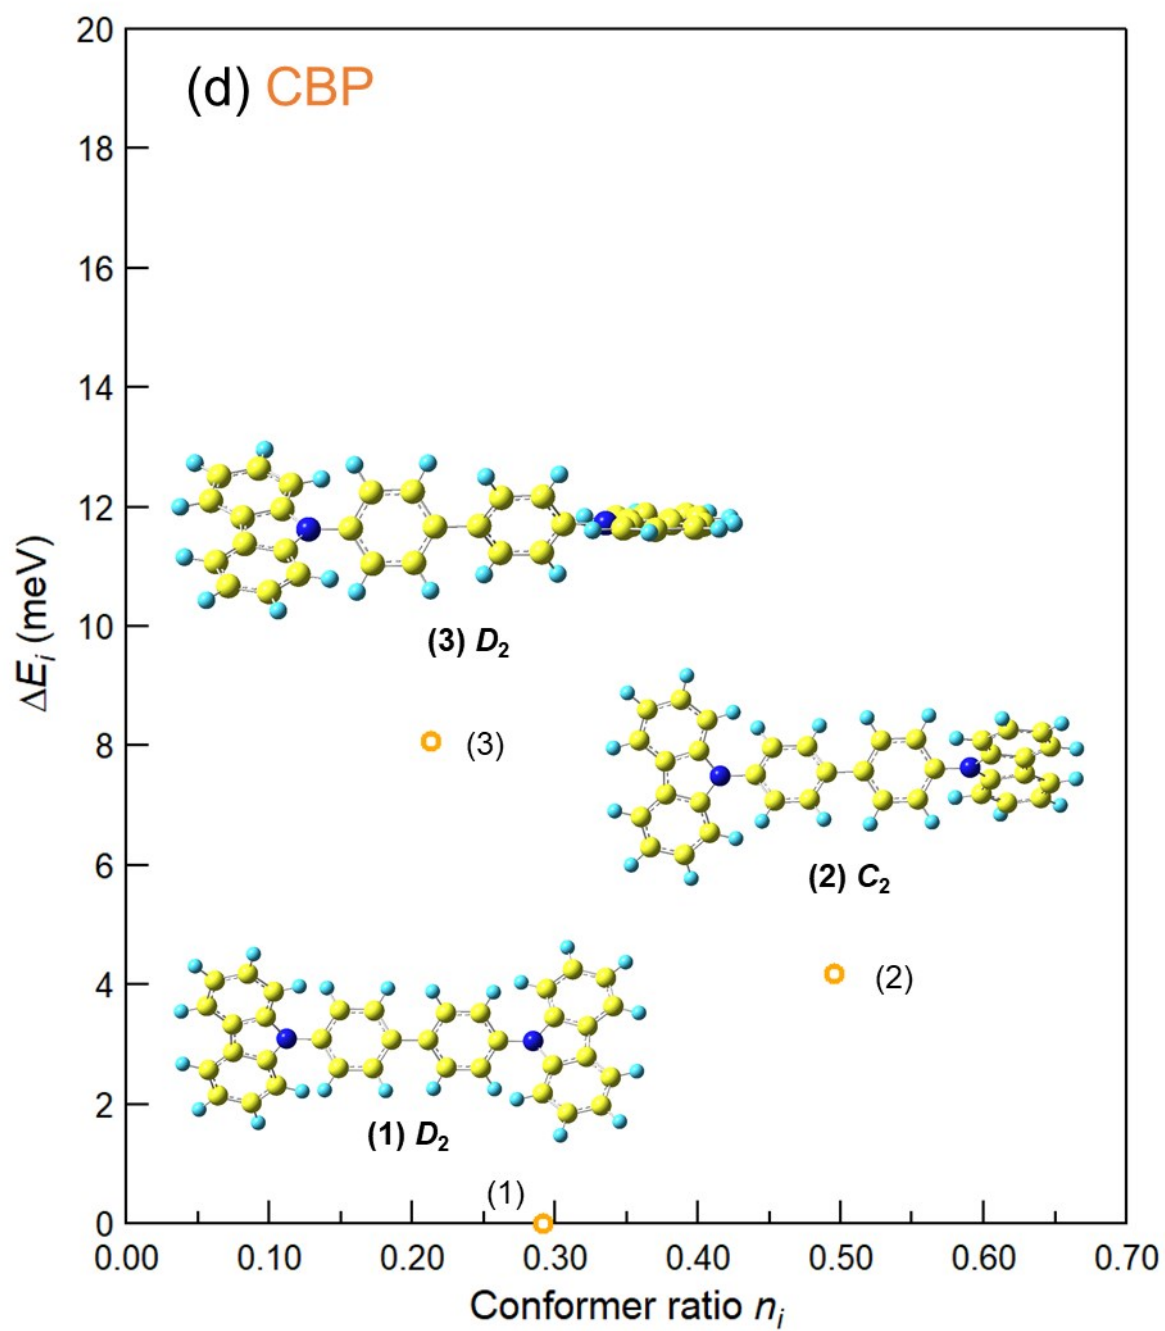

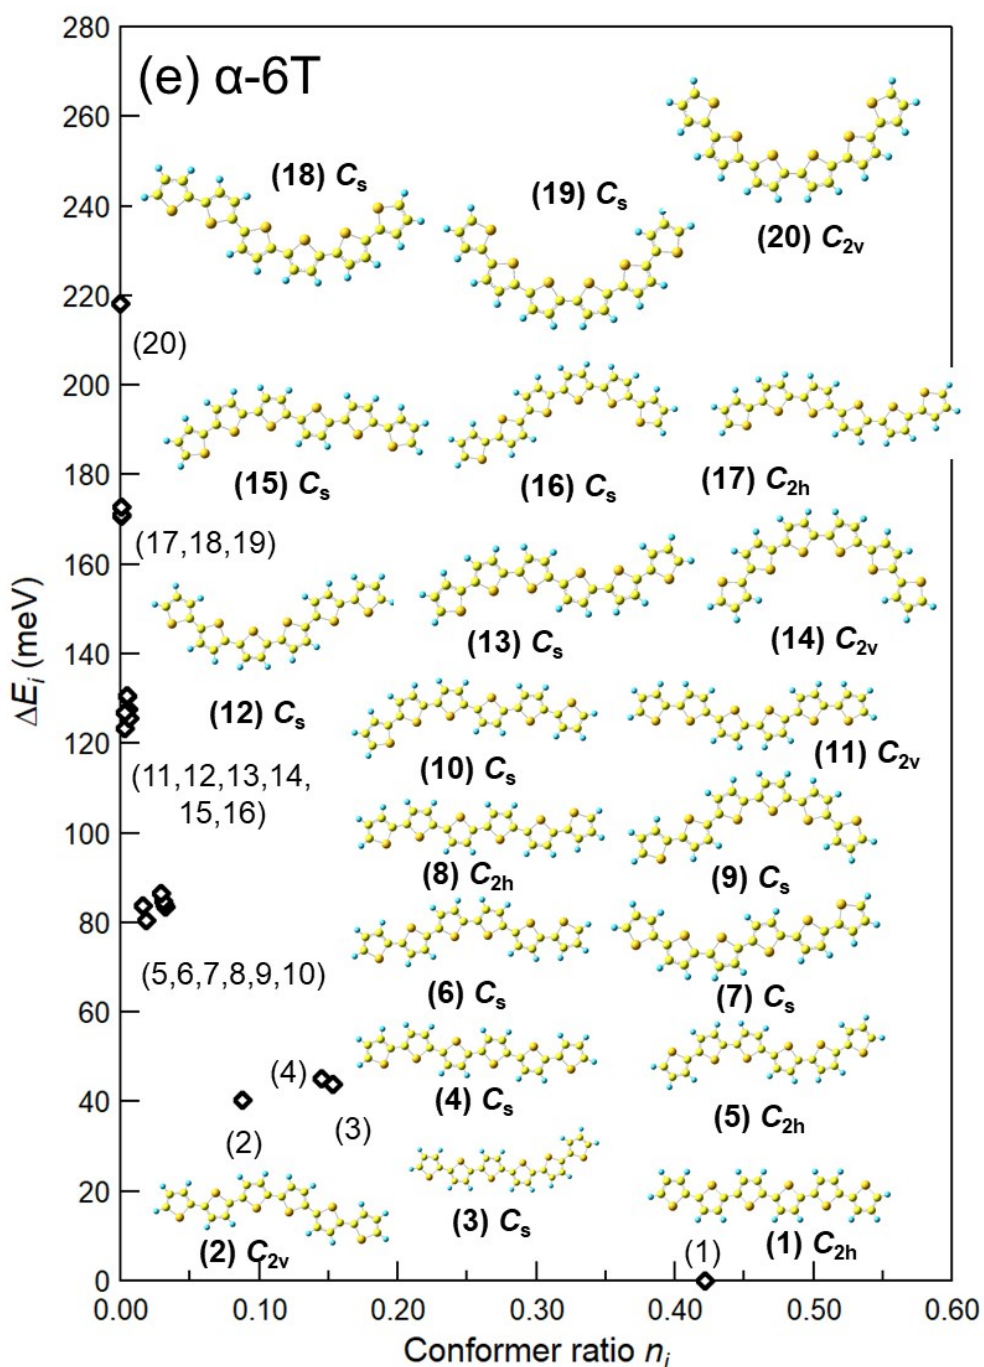

**Fig. S6** Conformer distributions and conformational structures of (a)  $\alpha$ -TNB, (b)  $\alpha\beta$ -TNB, (c)  $\beta$ -TNB, (d) CBP, and (e)  $\alpha$ -6T with the conformer number and symmetry group of each conformer. The conformers were comprehensively extracted by MM calculations with the MMFF94s force field. The conformational structures and their steric energies were obtained by DFT B3LYP/6-31G(d) calculations.

## G. Distortion angles of the triarylaminines $\theta$

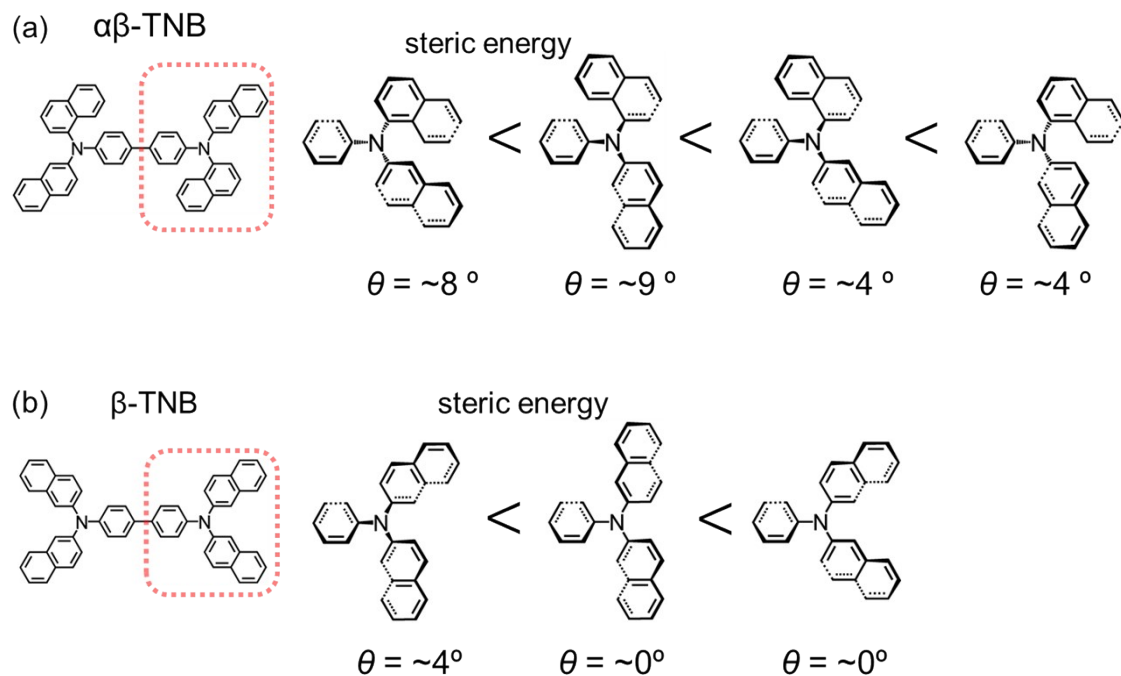

**Fig. S7** Relationship between the steric energy and the distortion angle of the conformers of the half structures of (a)  $\alpha\beta$ -TNB and (b)  $\beta$ -TNB obtained by MM and DFT B3LYP/6-31G(d) calculations.

## H. IR absorption spectra

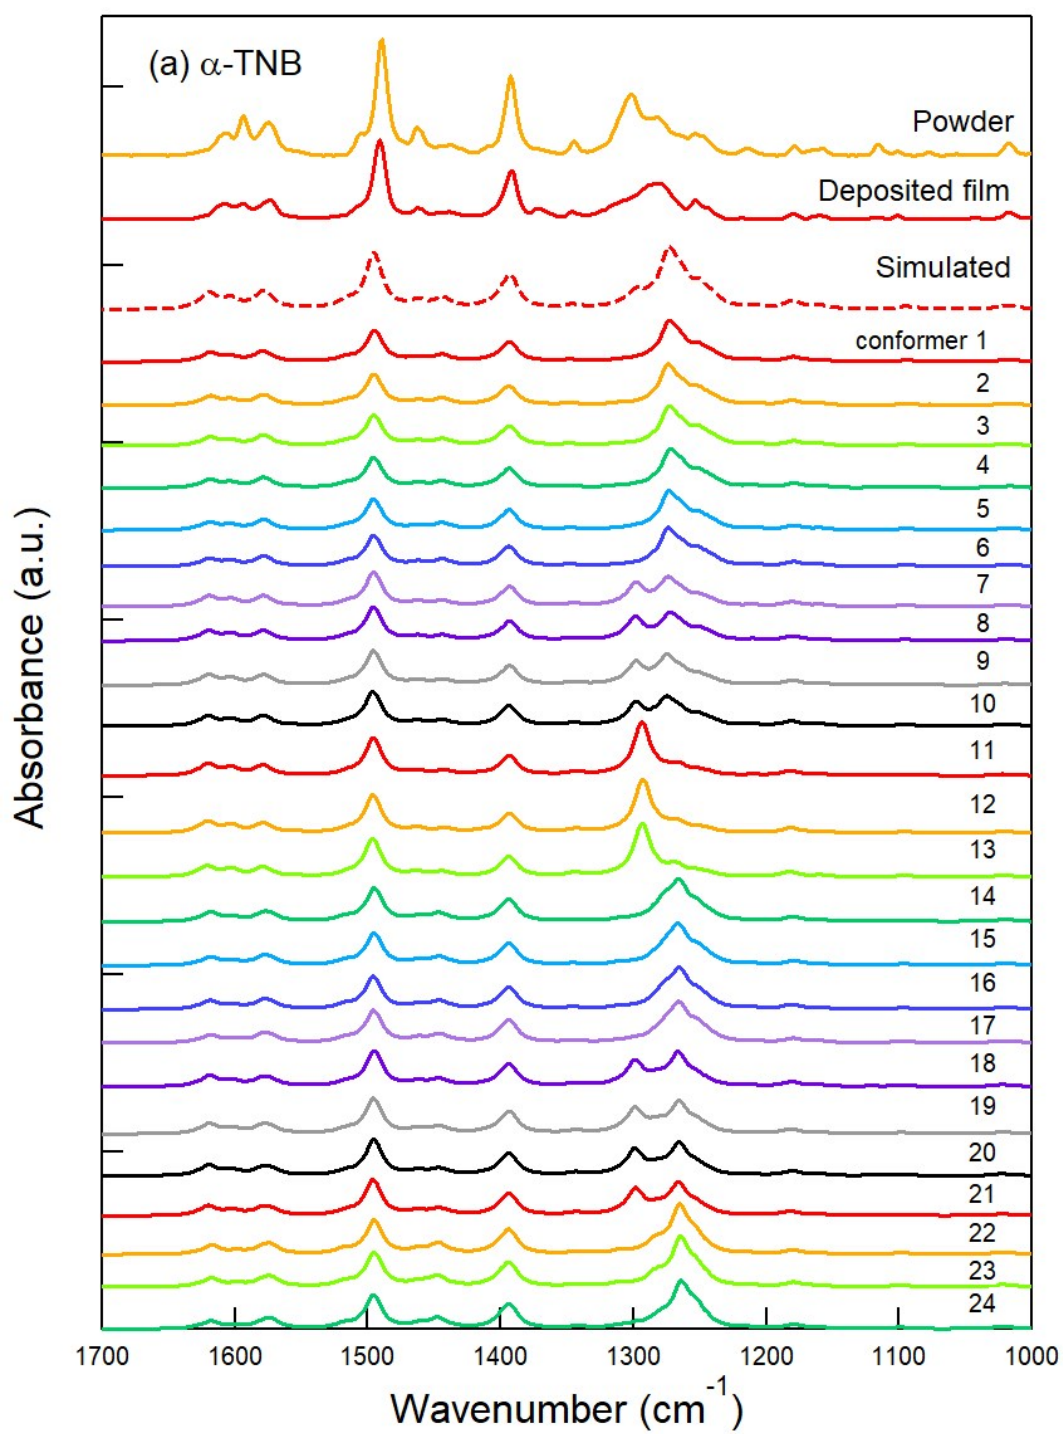

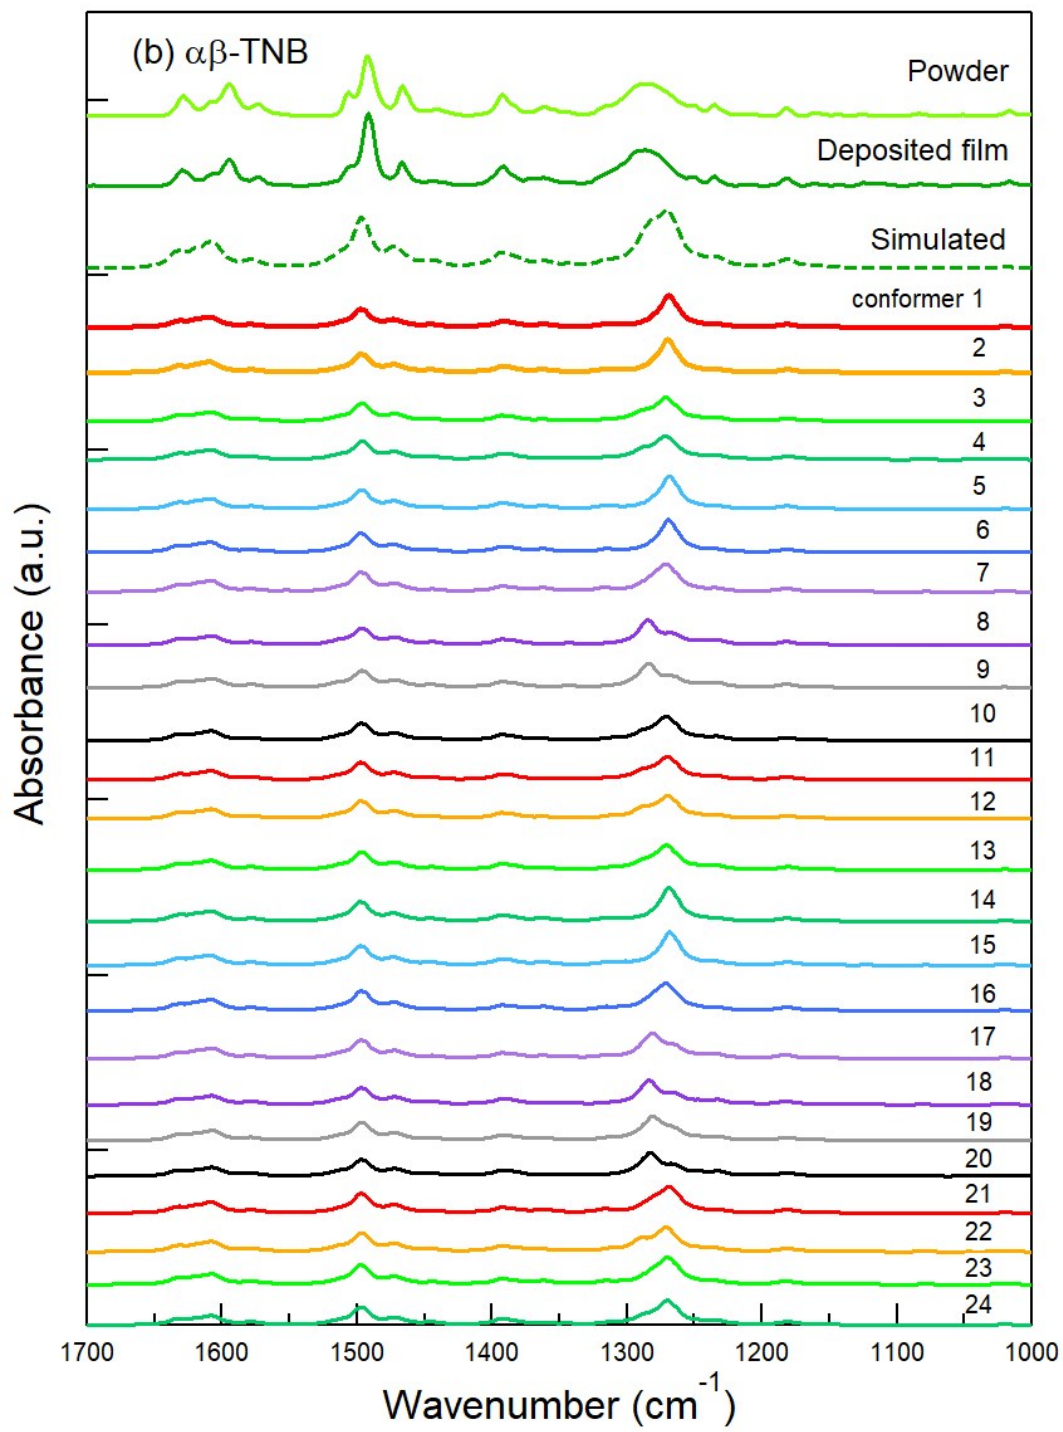

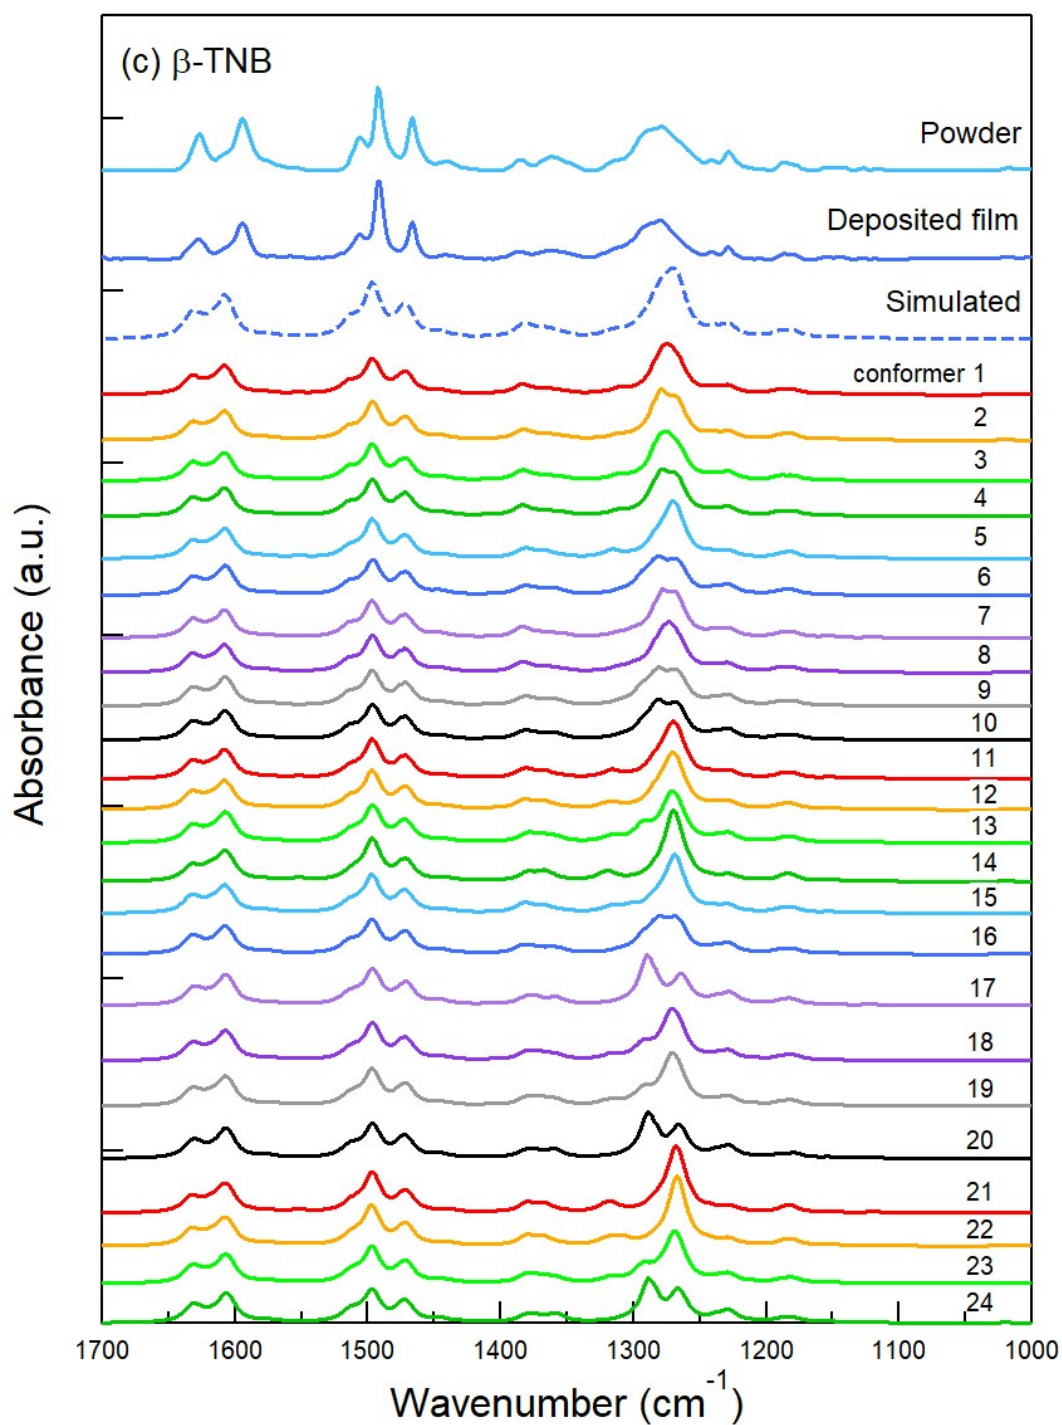

**Fig. S8** Experimental IR absorption spectra of the powders (measured by the KBr method) and vacuum-deposited films, calculated spectrum of each conformer, and simulated spectra of (a)  $\alpha$ -TNB, (b)  $\alpha\beta$ -TNB, and (c)  $\beta$ -TNB. The spectra of the conformers were obtained by DFT B3LYP/6-31G(d) calculations assuming a bandwidth of  $8 \text{ cm}^{-1}$  for all vibrational modes and a scaling factor of 0.97.



### I. XRD patterns of the powders

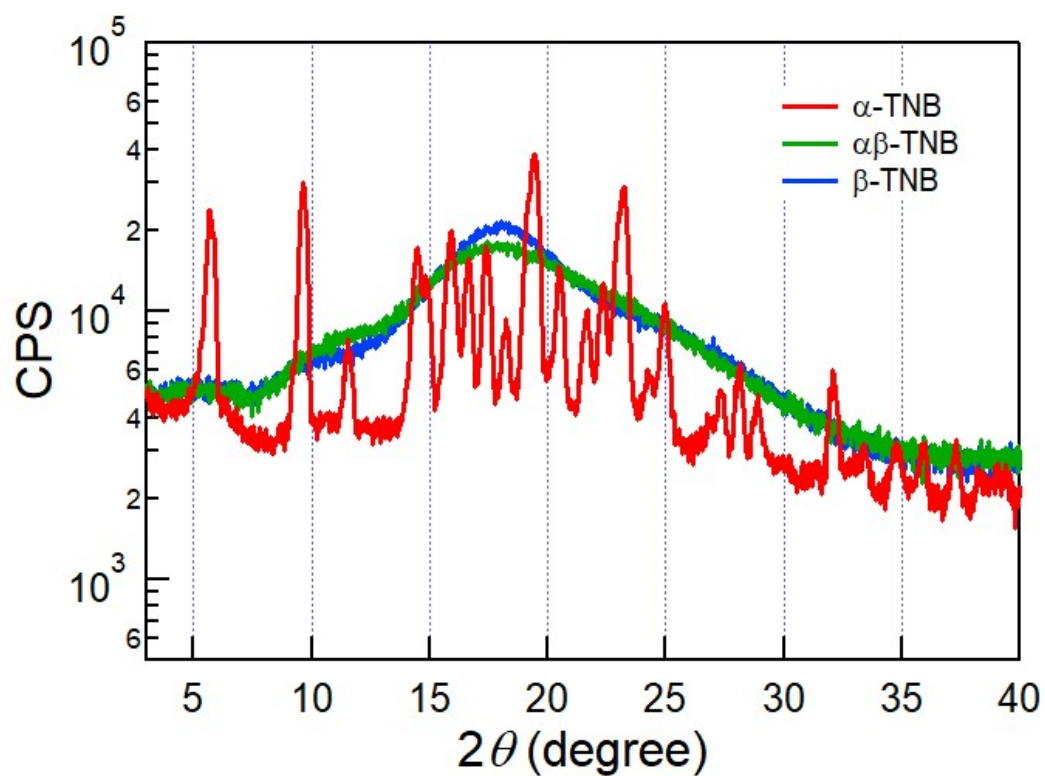

**Fig. S9** XRD patterns of the sublimed powders of  $\alpha$ -,  $\alpha\beta$ -, and  $\beta$ -TNB. Only the pattern of the  $\alpha$ -TNB powder has sharp peaks, indicating crystallinity.

## J. Single-crystal X-ray structure determination

**Table S2** Crystal data and structure refinement of  $\alpha$ -TNB

|                                        |                                                            |                     |
|----------------------------------------|------------------------------------------------------------|---------------------|
| Empirical formula                      | $C_{52} H_{36} N_2$                                        |                     |
| Formula weight                         | 688.83                                                     |                     |
| Temperature                            | 200 K                                                      |                     |
| Wavelength                             | 0.71073 Å                                                  |                     |
| Crystal system                         | Orthorhombic                                               |                     |
| Space group                            | <i>Iba2</i>                                                |                     |
| Unit cell dimensions                   | $a = 18.0128(10)$ Å                                        | $\alpha = 90^\circ$ |
|                                        | $b = 27.5447(16)$ Å                                        | $\beta = 90^\circ$  |
|                                        | $c = 7.2185(3)$ Å                                          | $\gamma = 90^\circ$ |
| Volume                                 | $3581.5(3)$ Å <sup>3</sup>                                 |                     |
| Z                                      | 4                                                          |                     |
| Density (calculated)                   | 1.277 g/cm <sup>3</sup>                                    |                     |
| Absorption coefficient                 | 0.074 mm <sup>-1</sup>                                     |                     |
| $F(000)$                               | 1448                                                       |                     |
| Crystal size                           | 0.15 x 0.07 x 0.05 mm <sup>3</sup>                         |                     |
| Theta range for data collection        | 2.702 to 26.496°                                           |                     |
| Index ranges                           | $-22 \leq h \leq 22, -34 \leq k \leq 34, -9 \leq l \leq 9$ |                     |
| Reflections collected                  | 22438                                                      |                     |
| Independent reflections                | 3694 [ $R(\text{int}) = 0.0570$ ]                          |                     |
| Completeness to theta = 25.242°        | 99.5 %                                                     |                     |
| Absorption correction                  | Semi-empirical from equivalents                            |                     |
| Max. and min. transmission             | 1.00000 and 0.55297                                        |                     |
| Refinement method                      | Full-matrix least-squares on $F^2$                         |                     |
| Data / restraints / parameters         | 3694 / 1 / 244                                             |                     |
| Goodness-of-fit on $F^2$               | 1.039                                                      |                     |
| Final $R$ indices [ $I > 2\sigma(I)$ ] | $R_1 = 0.0637, wR_2 = 0.1495$                              |                     |
| $R$ indices (all data)                 | $R_1 = 0.0906, wR_2 = 0.1668$                              |                     |
| Largest diff. peak and hole            | 0.207 and $-0.142$ e.Å <sup>-3</sup>                       |                     |

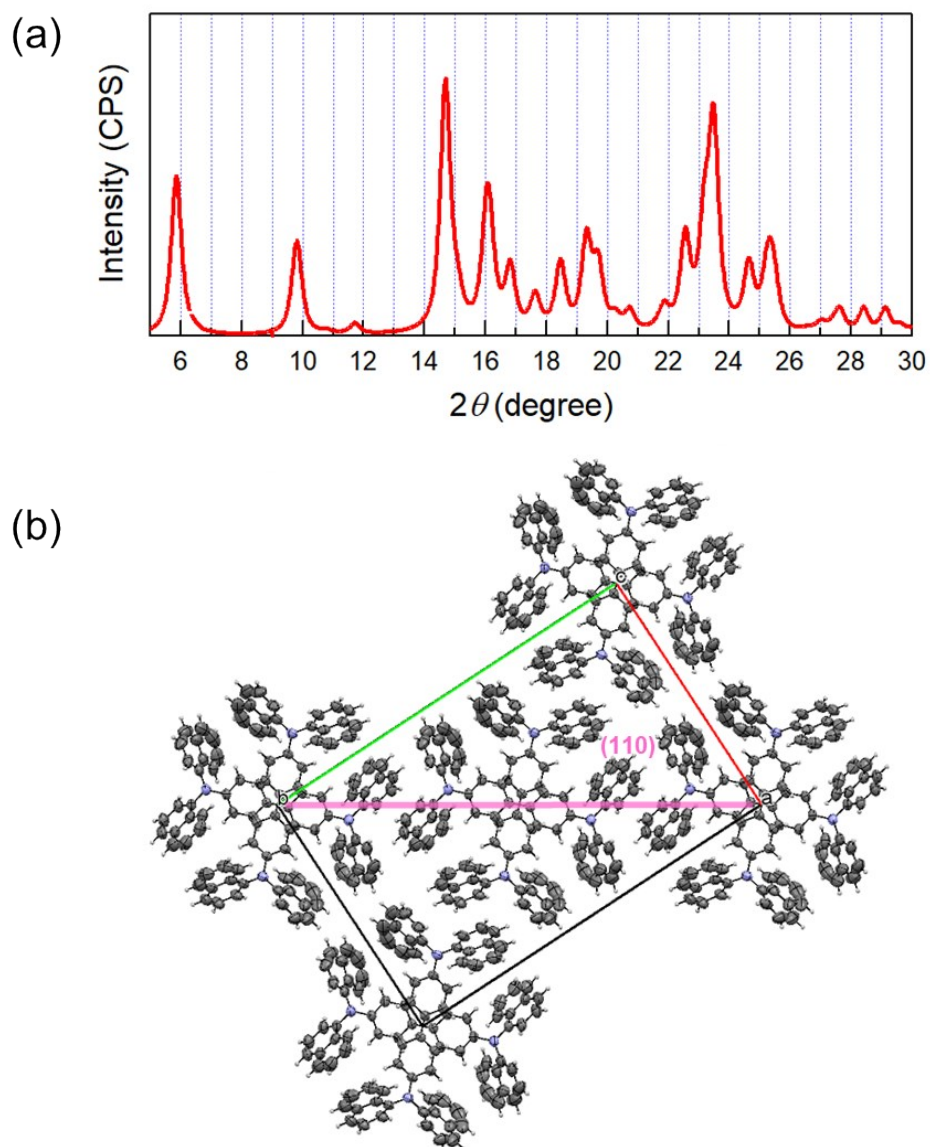

**Fig. S10** (a) XRD pattern of the single crystal of  $\alpha$ -TNB. (b) Single-crystal structure of  $\alpha$ -TNB. This structure is composed of only one conformer.

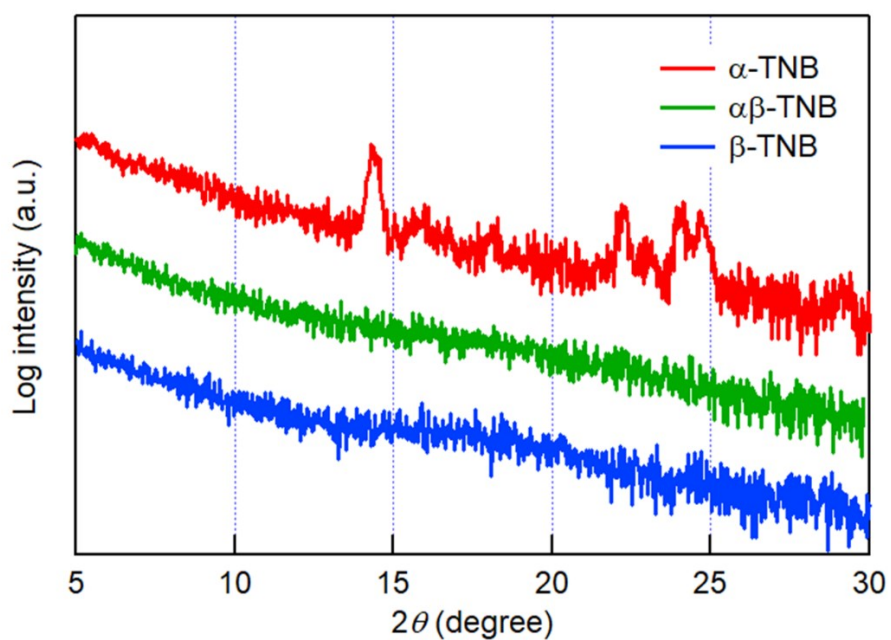

### K. XRD patterns of the transition-experienced films

**Fig. S11** In-plane XRD patterns of the  $\alpha$ -,  $\alpha\beta$ -, and  $\beta$ -TNB films heated to  $\sim 200$  °C and then cooled to room temperature.
